# Supplementary material for: Synthesis, microstructure and properties of Ti–Al porous intermetallic compounds prepared by a thermal explosion reaction
Source: Royal Society of Chemistry journal article supplement (doi:10.1039/c5ra04047g), 2015-01-01
Supplement: c5ra04047g1.pdf [file c5ra04047g1.pdf]

## Electronic Supplementary Information

**Journal name:** RSC Advances

Synthesis, microstructure and properties of Ti-Al porous intermetallic compounds  
prepared by thermal explosion reaction

Quanlin Shi <sup>a, b</sup>, Botao Qin <sup>a</sup>, Peizhong Feng <sup>b, \*</sup>, Huashen Ran <sup>b</sup>, Binbin Song <sup>b</sup>, Jianzhong Wang <sup>c</sup>, Yuan Ge <sup>c</sup>

<sup>a</sup> School of Safety Engineering, China University of Mining and Technology, Xuzhou, 221116, PR China

<sup>b</sup> School of Materials Science and Engineering, China University of Mining and Technology, Xuzhou, 221116, PR China

<sup>c</sup> State Key Laboratory of Porous Metal, Northwest Institute for Non-ferrous Metal Research, Xi'an, 710016, PR China

Corresponding author: Peizhong Feng, E-mail: fengroad@163.com, Tel: 086-516-83591879, Fax: 086-516-83591870

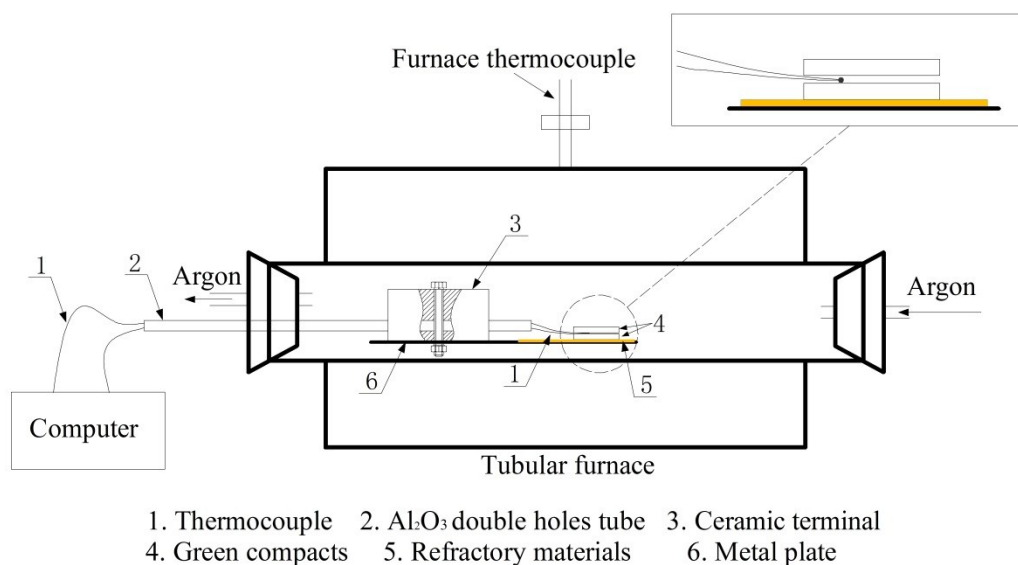

Fig. S1 The schematic of thermal explosion reaction apparatus

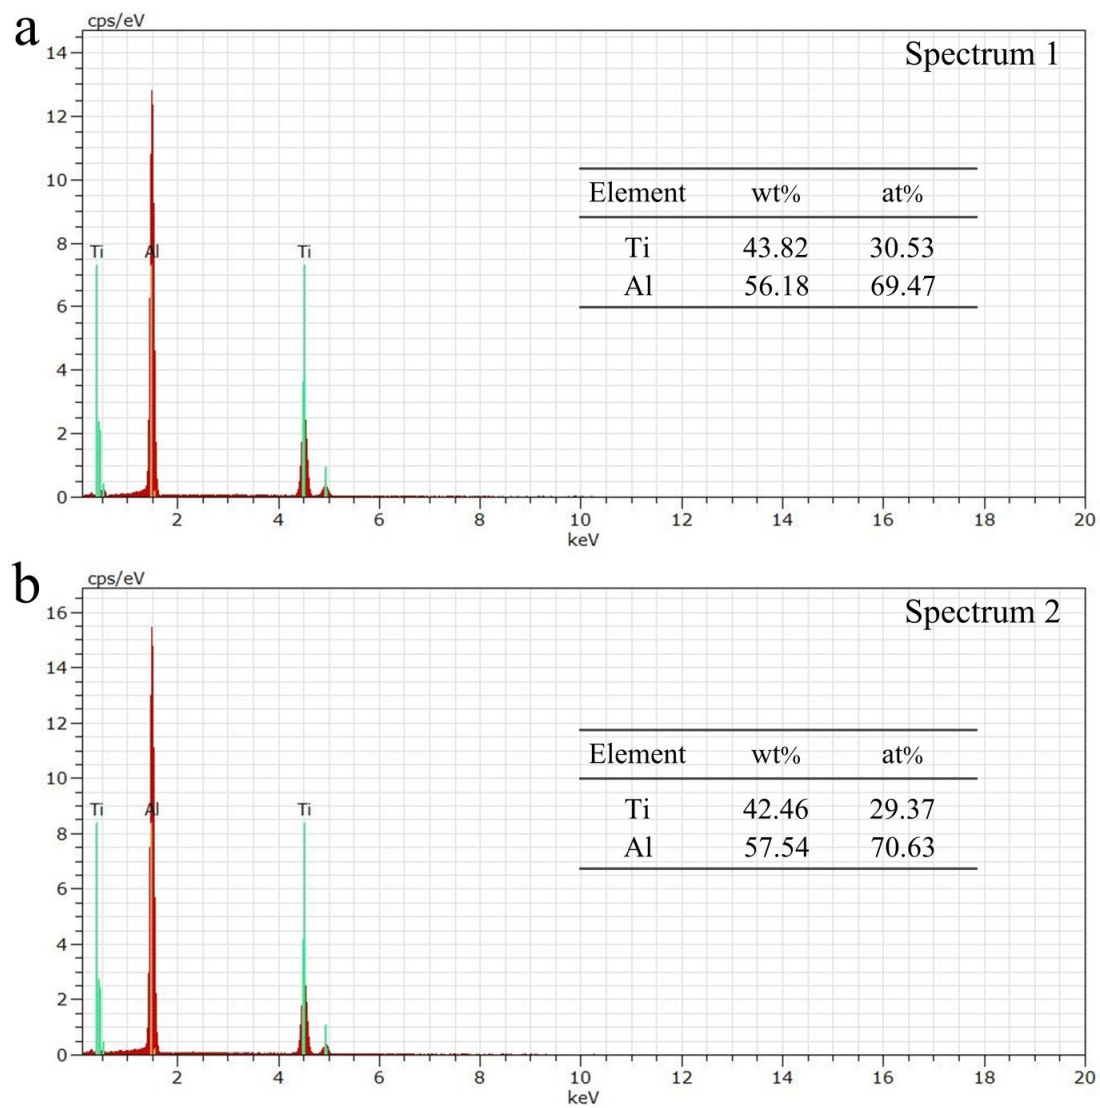

Fig. S2 The EDS point analysis of porous specimen with Ti:Al = 1:3 (furnace temperature 700 °C).
